## **SLO2.1 and NALCN form a functional complex to modulate myometrial cell excitability**

Juan J. Ferreira<sup>a,b,\*</sup>, Chinwendu Amazu<sup>a,\*</sup>, Lis C. Puga-Molina<sup>a</sup>, Sarah K. England<sup>a,#</sup> and Celia M. Santi<sup>a,b,#</sup>

### Addresses:

- a- Department of Obstetrics and Gynecology, Center for Reproductive Health Sciences, Washington University in St. Louis, School of Medicine, St. Louis, MO, United States.
- b- Department of Neuroscience, Washington University in St. Louis, School of Medicine, St. Louis, MO, United States

\*- Both authors contributed equally to this work.

#- Both authors are corresponding authors.

Correspondence should be addressed to [Englands@wustl.edu](mailto:Englands@wustl.edu) and [Santic@wustl.edu](mailto:Santic@wustl.edu).

## Abstract.

At the end of pregnancy, the uterus transitions from a quiescent state to an excitable, contractile state. These changes are linked to depolarization of the myometrial smooth muscle cell (MSMC) resting membrane potential. The membrane potential is primarily determined by the balance between an outward potassium ( $K^+$ ) leak current and an inward sodium ( $Na^+$ ) leak current. We recently described a  $Na^+$ -activated  $K^+$  channel (SLO2.1) and a non-selective  $Na^+$  leak channel (NALCN) in human MSMCs. Here, we asked whether these channels function together. We show that SLO2.1 currents are activated by an inward NALCN-dependent  $Na^+$  leak current, leading to MSMC hyperpolarization. The regulation of the membrane potential by NALCN/SLO2.1 activity modulates both  $Ca^{2+}$  entry through VDCCs, and myometrial contractility. Finally, NALCN and SLO2.1 are in proximity to one another in human MSMCs. We conclude that SLO2.1 and NALCN function together to regulate human MSMC membrane potential and excitability.

## Introduction

As pregnancy progresses, the uterus transitions from a quiescent, non-contractile state to a highly contractile state at labor. This transition is, in part, driven by changes in electrical activity of the myometrial smooth muscle cells (MSMCs). At the end of the second trimester, MSMCs have a hyperpolarized (more negative inside the membrane than outside) resting membrane potential of -75 mV, and the membrane potential depolarizes to -50 mV by the time of labor (Parkington, Tonta, Brennecke, & Coleman, 1999). This change of membrane potential is coupled with an increase in the frequency of uterine contractions (Casteels & Kuriyama, 1965; Parkington et al., 1999). The membrane potential is determined primarily by the balance between an outward potassium ( $K^+$ ) leak current and an inward sodium ( $Na^+$ ) leak current across the plasma membrane. If  $K^+$  efflux increases, the membrane potential becomes more negative, promoting quiescence. Conversely, it has long been thought that increased  $Na^+$  influx

causes the membrane potential to depolarize, promoting a more excitable and contractile uterine state due to opening of voltage-gated  $\text{Ca}^{2+}$  channels. Thus, identifying the ion channels and the molecular mechanisms that control membrane potential is key to understanding how MSMC excitability and uterine contractions are regulated.

We previously reported that SLO2.1, a member of the SLO2 family of  $\text{Na}^+$ -activated  $\text{K}^+$  channels, is expressed in human MSMCs (Dryer, 2003; Hage & Salkoff, 2012; Yuan et al., 2003). This channel has low voltage dependence and high conductance and can be significantly active at physiological intracellular  $\text{Na}^+$  concentration (Budelli et al., 2009; Hage & Salkoff, 2012). These characteristics suggest that SLO2.1 can modulate membrane potential and cell excitability by regulating  $\text{K}^+$  efflux. SLO2 channels are also highly expressed in other smooth muscle cells and brain (Dryer, 2003; Kameyama et al., 1984; P. Li et al., 2019; Smith et al., 2018), where they form complexes with voltage-gated  $\text{Na}^+$  channels (Hage & Salkoff, 2012; Takahashi & Yoshino, 2015). In these complexes, the  $\text{Na}^+$  conducted through the  $\text{Na}^+$  channels modulates  $\text{K}^+$  currents and their effect on membrane potential. Whether SLO2.1 forms a functional complex with a  $\text{Na}^+$  channel in human MSMCs to modulate membrane potential and cell excitability is unknown.

In human MSMCs, the role of voltage-gated  $\text{Na}^+$  channels is unclear, while the voltage-independent  $\text{Na}^+$  leak channel non-selective (NALCN) is expressed in human MSMCs (Reinl, Cabeza, Gregory, Cahill, & England, 2015). NALCN conducts about 50% of the  $\text{Na}^+$  leak current at the membrane potential in human MSMCs (Reinl et al., 2015). Thus, NALCN could be the channel that allows influx of  $\text{Na}^+$  to modulate SLO2.1 and thereby helps regulate membrane potential in MSMCs. Here, we provide evidence that SLO2.1 and NALCN form a functional complex that can regulate human MSMC membrane potential, excitability, and contractility.

## Results

### Na<sup>+</sup> influx through a gadolinium-sensitive channel activates SLO2.1 in human MSMCs

To test the hypothesis that Na<sup>+</sup> influx through NALCN activates SLO2.1, we first performed whole-cell patch clamp on primary human MSMCs treated with the SLO1 K<sup>+</sup> channel blocker tetraethylammonium (TEA) (**Figure 1A**) (Khan, Smith, Morrison, & Ashford, 1993). Consistent with our previous findings in MSMCs (Ferreira et al., 2019) and others' findings in neurons (Hage & Salkoff, 2012; Takahashi & Yoshino, 2015), addition of 80 mM extracellular Na<sup>+</sup> led to an 80-100% increase in K<sup>+</sup> currents at +80 mV and at -60 mV (**Figure 1B**), confirming that SLO2.1 is an Na<sup>+</sup>-activated K<sup>+</sup> channel. Next, because NALCN is a leak channel, we performed similar experiments in the presence of the Na<sup>+</sup> leak channel blocker gadolinium (Gd<sup>3+</sup>) and found that 10 μM Gd<sup>3+</sup> completely inhibited the K<sup>+</sup> current activated by addition of extracellular Na<sup>+</sup> (**Figure 1C-E**). Conversely, Gd<sup>3+</sup> had no effect on the SLO2.1 K<sup>+</sup> current when the intracellular solution contained 80 mM Na<sup>+</sup> (**Supp. Figure 2**). These results indicate that the Na<sup>+</sup> that activates K<sup>+</sup> efflux through SLO2.1 enters MSMCs through a Na<sup>+</sup> leak channel.

### SLO2.1-induced membrane hyperpolarization is modulated by a NALCN-dependent Na<sup>+</sup> leak current.

Efflux of K<sup>+</sup> can hyperpolarize the MSMC membrane potential, so we wondered whether Na<sup>+</sup> influx could activate SLO2.1 and thereby lead to membrane hyperpolarization. To measure changes in membrane potential, we performed flow cytometry of MSMCs in the presence of the fluorescent dye DiSC3(5), a cationic voltage-sensitive dye that accumulates on hyperpolarized membranes (Molina et al., 2019; Plasek & Hroudá, 1991; Santi et al., 2010). Treating the cells with 80 mM extracellular Na<sup>+</sup> led to a 30.48 ± 20.62% increase in DiSC3(5) fluorescence, indicating that membrane hyperpolarization was activated by Na<sup>+</sup> influx. In contrast, treating the

cells with 80 mM Choline, an impermeable cation, only led to a  $9.91 \pm 9.76\%$  increase in DiSC3(5) fluorescence, indicating that the effect of  $\text{Na}^+$  was not due to a change in osmolarity (**Figure 2**). Additionally, treating the cells with 80 mM lithium ( $\text{Li}^+$ ), a permeable cation that does not activate SLO2.1, only led to a  $2.01 \pm 6.54\%$  increase in DiSC3(5) fluorescence (**Figure 2**), indicating that  $\text{Na}^+$  influx, and not simply a change in membrane potential, activated SLO2.1.

To determine whether NALCN was responsible for the influx of  $\text{Na}^+$ , we first treated cells with  $\text{Gd}^{3+}$ . In this condition, addition of  $\text{Na}^+$  only increased DiSC3(5) fluorescence by  $6.01 \pm 7.16\%$  (**Figure 2**). This response was similar to the increased DiSC3(5) fluorescence measured in cells treated with choline or  $\text{Li}^+$  ( $P = 0.163$  and  $0.662$ , respectively) (**Figure 2**). In a separate experiment, we found that, in the presence of  $\text{Gd}^{3+}$ ,  $\text{Na}^+$  and choline increased DiSC3(5) fluorescence by similar amounts ( $5.63 \pm 4.57\%$  vs.  $6.01 \pm 7.16\%$ ,  $P = 0.833$ ) (**Supp Figure 3A**).

Although  $\text{Gd}^{3+}$  inhibits NALCN, it also inhibits transient receptor potential canonical (TRPC) channels, which primarily conduct  $\text{Ca}^{2+}$  but can also conduct  $\text{Na}^+$  (Babich et al., 2004; Dalrymple, Mahn, Poston, Songu-Mize, & Tribe, 2007; Dalrymple, Slater, Beech, Poston, & Tribe, 2002; Ku et al., 2006; Wang et al., 2020). Because TRPC1, 3, and 6 are expressed in human MSMCs (Babich et al., 2004; Dalrymple et al., 2007; Dalrymple et al., 2002; Ku et al., 2006; Wang et al., 2020), we next asked whether GsMTx-4, which inhibits TRPC1 and TRPC6, and Pyr3, which inhibits TRPC3, would affect  $\text{Na}^+$ -induced membrane hyperpolarization. In the presence of these inhibitors,  $\text{Na}^+$ -induced increase in DiSC3(5) fluorescence was significantly lower than in their absence ( $17.77 \pm 12.10\%$  vs.  $30.48 \pm 20.62\%$ ,  $P = 0.040$ ) (**Figure 2**). However,  $\text{Na}^+$ -induced increase in DiSC3(5) fluorescence was significantly greater in the presence of these inhibitors than in the presence of  $\text{Gd}^{3+}$  ( $17.77 \pm 12.10\%$  vs.  $6.01 \pm 7.16\%$ ,  $P = 0.029$ ) (**Figure 2**). Additionally, in the presence of TRPC blockers,  $\text{Na}^+$  induced a greater increase in DiSC3(5) fluorescence than did choline ( $17.77 \pm 12.10\%$  vs.  $5.21 \pm 6.426$ ,  $P = 0.008$ ) (**Supp. Figure 3B**). Thus, we conclude that, although  $\text{Na}^+$  influx through TRPC channels

is partially responsible for SLO2.1-dependent hyperpolarization, Na<sup>+</sup> influx through NALCN is responsible for ~60% of the Na<sup>+</sup>-activated, SLO2.1-dependent hyperpolarization in human MSMCs.

### Functional coupling of Na<sup>+</sup> influx and K<sup>+</sup> efflux modulates MSMC Ca<sup>2+</sup> responses and myometrial contractility

Our data thus far suggested that Na<sup>+</sup> influx through NALCN activated SLO2.1, leading to K<sup>+</sup> influx and MSMC membrane hyperpolarization. To determine whether these effects on ion channel activity and membrane potential had a functional outcome, we first examined the effects on intracellular calcium (Ca<sup>2+</sup>). In human MSMCs, membrane depolarization increases Ca<sup>2+</sup> influx through voltage-dependent Ca<sup>2+</sup> channels (VDCCs), and Ferreira *et al.* showed that inhibiting SLO2.1 triggered Ca<sup>2+</sup> entry through VDCCs (Ferreira *et al.*, 2019). Thus, we hypothesized that Na<sup>+</sup> influx through NALCN activates SLO2.1, leading to K<sup>+</sup> influx, membrane hyperpolarization, and inhibition of Ca<sup>2+</sup> influx.

To test this idea, we used the Ca<sup>2+</sup> indicator Fluo4-AM to measure intracellular Ca<sup>2+</sup> concentration. First, it is known that MSMCs at baseline have low frequency spontaneous calcium release. When we treated MSMCs with increasing concentrations of KCl to prevent K<sup>+</sup> efflux and induce membrane depolarization, a significant increase in intracellular Ca<sup>2+</sup> oscillations was observed at 20 and 50 mM KCl (**Figure 3A**). Next, to evaluate the effects of extracellular Na<sup>+</sup> on intracellular Ca<sup>2+</sup> responses, we treated MSMCs with either 0 mM NaCl plus 80 mM choline (to prevent Na<sup>+</sup> influx but maintain osmolarity) or 80 mM NaCl (to promote Na<sup>+</sup> influx). Ca<sup>2+</sup> oscillations similar to those induced by 50 mM KCl were evident in the presence of 0 mM NaCl but not in the presence of 80 mM NaCl (**Figure 3B, C, Supp. Figure 4A**). We then performed similar experiments in which we substituted Na<sup>+</sup> with Li<sup>+</sup>, which does not activate SLO2.1. The Ca<sup>2+</sup> oscillations similar to those induced by 50 mM KCl were evident in the presence of 135 mM Li<sup>+</sup> but not in the presence of 135 mM Na<sup>+</sup> (**Figure 3C and D**). To confirm

that the  $\text{Ca}^{2+}$  increases in 0 mM NaCl (135 mM  $\text{Li}^+$ ) were dependent on extracellular  $\text{Ca}^{2+}$ , we repeated the  $\text{Li}^+$  experiment in the presence of 0 mM extracellular  $\text{Ca}^{2+}$  and 2 mM EGTA and verapamil, VDCC blocker (**Supp. Figure 4B and C**). We observed no intracellular  $\text{Ca}^{2+}$  increases in 0 mM extracellular  $\text{Ca}^{2+}$  conditions and a significant reduction in the number of the cells responding to  $\text{Li}^+$  and verapamil than to  $\text{Li}^+$  alone (**Figures 3D and E, Supp. Figure 4B and C**). Values in  $\text{Li}^+$  alone and with verapamil are  $61.8 \pm 20.62$ ,  $n=5$ , and  $9.8 \pm 1.9$ ,  $n=3$ , respectively. We conclude that, in the absence of  $\text{Na}^+$  influx through NALCN, SLO2.1 is inactive, thus reducing  $\text{K}^+$  efflux and depolarizing the MSMC membrane, leading to VDCC activation and  $\text{Ca}^{2+}$  oscillations.

In MSMCs, increases in intracellular  $\text{Ca}^{2+}$  activate myosin and lead to contraction. To determine whether low extracellular  $\text{Na}^+$  would increase uterine muscle basal tension and contractility, we performed tension recording on myometrial strips obtained from women who underwent an elective cesarean delivery. **Figure 3G** shows a representative trace of a myometrial strip bathed in normal Krebs solution containing 133 mM  $\text{Na}^+$ . When the extracellular  $\text{Na}^+$  was reduced from 133 mM to 33.25 mM, both the basal ( $0.61 \pm 0.15$  g vs.  $2.51 \pm 0.68$  g,  $P=0.0104$ ) and total ( $219 \pm 113$  g vs.  $1118 \pm 366.4$  g,  $P=0.0251$ ) tension produced by the myometrial strips significantly increased (**Figures 3H and I**). This finding suggests that  $\text{Na}^+$  influx leads to decreased myometrial contractility.

#### NALCN and SLO2.1 co-localize in human MSMCs

The above data together suggest that  $\text{Na}^+$  influx through NALCN activates SLO2.1, leading to  $\text{K}^+$  efflux, membrane hyperpolarization, and decreased intracellular  $\text{Ca}^{2+}$ . These findings, combined with the knowledge that SLO2.1 forms functional complexes with the  $\text{Na}^+$  channels that activate it in neurons (Hage & Salkoff, 2012; Takahashi & Yoshino, 2015), led us to propose that NALCN co-localizes with SLO2.1 in human MSMCs. To test this idea, we

performed *in situ* proximity ligation assays in both human primary MSMCs and hTERT-HM cells. In this assay, cells are stained with antibodies recognizing the two proteins of interest and DNA-tagged secondary antibodies. If the two proteins are within 40 nm of one another, DNA ligation and amplification occur, which can then be detected as fluorescent punctae in the cells. In both MSMCs and hTERT-HMs, we detected significantly more punctae in cells stained with antibodies specific to NALCN and SLO2.1 than in cells stained with either antibody alone or only secondary antibodies (**Figure 4**). We conclude that NALCN and SLO2.1 colocalize in human MSMCs.

## Discussion

Here, we have presented four lines of evidence that NALCN and SLO2.1 function together to modulate MSMC membrane potential and excitability. First, we report that SLO2.1 activity is activated by Na<sup>+</sup> influx carried by a NALCN-dependent Na<sup>+</sup> leak current. Second, this activation of SLO2.1 leads to membrane hyperpolarization, and we show that Na<sup>+</sup> influx through NALCN is responsible for ~60% of the SLO2.1-dependent hyperpolarization in human MSMCs. Third, we show that NALCN-mediated regulation of SLO2.1 activity in turn regulates Ca<sup>2+</sup> entry through VDCCs and influences myometrial contractility. Finally, we show that NALCN and SLO2.1 are in proximity to one another in MSMC membranes. This proximity likely allows NALCN to locally modify the Na<sup>+</sup> concentration in intracellular microdomains containing SLO2.1 without changing the bulk intracellular Na<sup>+</sup> concentration (Hage & Salkoff, 2012; P. Li et al., 2019).

We recently published evidence regarding another mechanism by which SLO2.1 is regulated in human MSMCs. In that work, we found that oxytocin acting through a non-canonical pathway inhibits SLO2.1 and induces an increase in intracellular Ca<sup>2+</sup> by opening VDCC (Ferreira et al., 2019). These results were in line with data published by Arnaudeau et al.



suggesting that oxytocin has a sustained effect on the VDCC-dependent intracellular  $\text{Ca}^{2+}$  concentration in MSMCs from pregnant rats (Arnaudeau, Lepretre, & Mironneau, 1994). We also recently demonstrated that NALCN expression and activity are regulated by the hormones progesterone and estrogen.

Taken together, our work and the work of others lead us to propose the model shown in **Figure 5**. During the quiescent state, progesterone upregulates expression of NALCN (Amazu et al., 2020), leading to an increase in the NALCN-dependent  $\text{Na}^+$  leak current. This  $\text{Na}^+$  influx activates SLO2.1 channels locally, leading to  $\text{K}^+$  efflux and membrane hyperpolarization. This hyperpolarization promotes the closed state of VDCCs, limiting  $\text{Ca}^{2+}$  influx and contractility. During the contractile state, estrogen inhibits expression of NALCN, reducing  $\text{Na}^+$  influx and preventing SLO2.1 activation. As a result of decreased SLO2.1-mediated  $\text{K}^+$  efflux, the membrane depolarizes, leading to VDCC activation,  $\text{Ca}^{2+}$  influx, activation of myosin, and MSMC contractility. Additionally, at labor, oxytocin further induces  $\text{Ca}^{2+}$  release from intracellular stores and inhibits SLO2.1 activity via signaling through the protein kinase C pathway (Ferreira et al., 2019). Future work will be aimed at further testing this model and defining the mechanisms by which the actions of the hormones progesterone, estrogen, and oxytocin work in concert with the activity of ion channels to regulate MSMC excitability and contractility appropriately during pregnancy.

In addition to SLO2.1, MSMCs express other  $\text{K}^+$  channels including the inward rectifier Kir7.1 and  $\text{Ca}^{2+}$ -activated Maxi-K (Brainard, Korovkina, & England, 2007; Ferreira et al., 2019; Khan et al., 1993; McCloskey et al., 2014). Expression of Kir7.1 channels peaks in mid-pregnancy in mice, and Kir7.1 currents contribute to maintaining a hyperpolarized membrane potential and low contractility during the quiescent stage of pregnancy in both mouse and human uterine tissue (McCloskey et al., 2014). This suggests that Kir7.1 could contribute to regulating the transition from the quiescent to the contractile state during pregnancy. However, Ferreira *et al.* showed that Maxi-K and SLO2.1 together contribute to ~87% of the  $\text{K}^+$  current in human

MSMCs (Ferreira et al., 2019). Further work is thus needed to fully define the activities of the numerous K<sup>+</sup> channels in MSMCs.

In addition to NALCN, MSMCs from rats and humans also express other channels that conduct Na<sup>+</sup>, such as the TRPC family members TRPC1, 3, and 6 (Babich et al., 2004; Dalrymple et al., 2007; Dalrymple et al., 2002; Ku et al., 2006; Lacampagne, Gannier, Argibay, Garnier, & Le Guennec, 1994; Wang et al., 2020; Yang & Sachs, 1989). Although these channels are inhibited by Gd<sup>3+</sup>, we show here that TRPC1, 3, and 6 jointly contribute to ~40% of the Na<sup>+</sup>-activated, SLO2.1-dependent hyperpolarization in human MSMCs. The exact regulation and role of TRPCs during pregnancy is under investigation. On the one hand, TRCP6 mRNA and protein expression are downregulated, whereas TRPC1 expression is unchanged, during pregnancy in rats (Babich et al., 2004). On the other hand, TRPCs are sensitive to multiple signals *in vitro*, including mechanical stretch and IL-1 $\beta$ , that are important during labor (Csapo, Erdos, De Mattos, Gramss, & Moscovitz, 1965; Dalrymple et al., 2007; Douglas, Clarke, & Goldspink, 1988). Thus, although TRPCs seem to play some role in regulating MSMC membrane potential, their more important role may be in regulating MSMC activity during labor.

Previous work had shown that depolarizing Na<sup>+</sup> leak currents could contribute to pacemaker activity in dopaminergic neurons and gastrointestinal cells (Khaliq & Bean, 2010; Kim et al., 2012; Koh, Jun, Kim, & Sanders, 2002). Given that MSMC action potentials are driven by an influx of Ca<sup>2+</sup> through VDCC that open in response to a slow recurrent depolarization between action potentials (pacemaker current) (Amedee, Mironneau, & Mironneau, 1987; Kuriyama & Suzuki, 1976; Lammers, 2013; Wray et al., 2003), it seemed possible that NALCN could regulate pacemaker activity in MSMCs. However, if NALCN were involved in setting the pacemaker activity, cells lacking NALCN should have a disrupted inter-burst frequency of action potentials. Instead, Reinlet *et al.* only observed a significant reduction in the burst duration and no significant effect on myometrial inter-burst frequency at day 19 of

pregnancy in NALCN knockout mice (Reinl et al., 2018). In conclusion, these results suggest that, instead of regulating the pacemaker, NALCN regulates myometrial excitability by modulating the permeability of other ions (particularly  $K^+$ ) and thereby regulating MSMC membrane potential (Ferreira et al., 2019; Reinl et al., 2015; Reinl et al., 2018). Additional work is needed to establish the contribution of the functional complex between NALCN and SLO2.1 channels on myometrial excitability at different stages of pregnancy.

## **Methods and Materials**

### Ethical Approval and Acquisition of Human Samples

This study was approved by the Washington University in St. Louis Institutional Review Board (approval no. 201108143) and conformed to the Declaration of Helsinki except for registration in a database. We obtained a signed written consent from each patient. Human tissue samples ( $0.1\text{-}1.0\text{ cm}^2$ ) from the lower uterine segment were obtained from non-laboring women at term (37 weeks of gestation) during elective Cesarean section under spinal anesthesia. Samples were stored at  $4^\circ\text{C}$  in phosphate buffered saline (PBS) and processed for MSMC isolation within 60 min of acquisition.

### Cell Culture

Primary human MSMCs were isolated and cultured as previously described (Y. Li, Lorca, Ma, Rhodes, & England, 2014). Briefly, tissue was treated with PBS containing  $50\mu\text{g/mL}$  gentamicin and  $5\mu\text{g/mL}$  fungizone, then cut into 2 to 3 mm pieces and cultured in DMEM:F12 medium with 5% Fetal Bovine Serum (FBS), 0.2% fibroblast growth factor- $\beta$ , 0.1% epidermal growth factor, 0.05% insulin, 0.05% gentamicin, and 0.05% fungizone. Colonies were amplified to form primary cell cultures. Primary MSMCs and human telomerase reverse transcriptase-immortalized myometrial cells (hTERT-HM) were incubated at  $37^\circ\text{C}$  and 5%  $\text{CO}_2$  in phenol-red

free DMEM:F12 medium with 10% FBS, 100 units/ml penicillin, and 100 µg/ml streptomycin or 25 µg/mL gentamicin (Sigma, St. Louis, MO) (Condon et al., 2002). Primary MSMCs were used within two passages, and hTERT-HM cells were used in passages lower than 15.

### Electrophysiology

Cells were starved in serum-free DMEM:F12 for at least 2 hours before experiments. For all experiments, pipettes were pulled from borosilicate glass from Warner Instruments. For whole-cell recording, pipettes with a resistance of 0.8 to 1.8 megaohms and symmetrical K<sup>+</sup> were used. External solution was (in mM): 160 KCl, 80 NaCl, 2 MgCl<sub>2</sub>, 10 HEPES, and 5 TEA, pH adjusted to 7.4 with NaOH. For the 0 mM Na<sup>+</sup> solution, Na<sup>+</sup> was replaced with 80 mM CholineCl, and pH was adjusted with KOH; the concentration of external K<sup>+</sup> varied from 4.5 to 5.5 mM. The pipettes were filled with (in mM): 160 KCl, 80 cholineCl or 80 NaCl, 10 HEPES, 0.6 free Mg<sup>2+</sup>, and either 0 or 100 nM free Ca<sup>2+</sup> solutions with 1 mM EGTA. Variations in the solutions are indicated in the figures. During electrophysiological experiments, the cells and the intracellular side of the membrane were perfused continuously. Traces were acquired with an Axopatch 200B (Molecular Devices), digitized at 10 kHz for whole-cell or macro-patch recordings or at 100 kHz for single-channel recordings. Recordings were filtered at 2 kHz, and pClamp 10.6 (Molecular Devices) and SigmaPlot 12 (Jandel Scientific) were used to analyze the data.

### Determination of Membrane Potential by Flow Cytometry

The hTERT-HM cells were centrifuged at 1000 rpm for 5 min. Cells were resuspended in modified Ringers solution containing (in mM): 80 Choline Cl, 10 HEPES, 5 Glucose, 5 KCl, and 2 CaCl<sub>2</sub>; pH 7.4). Before recording, 0.02 mg/mL Hoechst and 150 nM DiSC<sub>3</sub>(5) were added to 500 µL of cell suspension, and data were recorded as individual cellular events on a FACSCanto II TM cytometer (BD Biosciences, Franklin Lakes, NJ). Side scatter area (SSC-A) and forward scatter area (FSC-A) fluorescence data were collected from 100,000 events per

recording. Threshold levels for FSC-A and SSC-A were set to exclude signals from cellular debris (Supp. Figure 1A). Doublets, aggregates, and cell debris were excluded from analysis based on a dual parameter dot plot in which pulse signal (signal high; SSC-H; y-axis) versus signal area (SSC-A; x-axis) was displayed (Supp. Figure 1B). Living Hoechst-negative cells were selected by using the filter (Pacific Blue; 450/50), and DiSC3(5)-positive cells were detected with the filter for allophycocyanine (APC; 660/20) (Supp. Figure 1C). To measure the effect of Na<sup>+</sup> on membrane potential, 80 mM NaCl, Choline chloride, or Lithium (Li<sup>+</sup>) was added to the 500  $\mu$ L suspensions. In some cases as indicated in the figures, 10  $\mu$ M gadolinium (Gd<sup>3+</sup>), a concentration known to inhibit NALCN current (Lu et al., 2007), 500 nM GsMTx4 (a peptide inhibitor of TRPC1 and TRPC6 isolated from Grammostolaspatulata spider venom), and 1  $\mu$ M Pyr3 (pyrazole; blocks TRPC3 inhibitor) were added to the cell suspension (Bowman, Gottlieb, Suchyna, Murphy, & Sachs, 2007; Kiyonaka et al., 2009; Lu et al., 2007). Valinomycin hyperpolarize the cell according to the equilibrium potential for K<sup>+</sup>. Normalization was performed according to  $(F_{\text{Ref}} - F_{\text{Ion}}) / (F_{\text{Valino}} - F_{\text{Ion}})$ , being  $F_{\text{Ref}}$  median of the fluorescence of the population in the basal condition,  $F_{\text{Ion}}$  after the addition of the cation, and  $F_{\text{Valino}}$  after addition of Valinomycin. Normalization was performed by adding 1  $\mu$ M valinomycin (Sigma, St. Louis, MO). FlowJo 10.6.1 software was used to analyze data, reported as median values.

### Calcium Imaging

Cells were grown on glass coverslips with the media described above for MSMCs. Cells were pre-incubated with 2  $\mu$ M Fluo-4 AM and 0.05-0.1% Pluronic Acid F-127 in Opti-Mem for 60-90 min. To allow the dye to equilibrate in the cells, the cells were removed from the loading solutions and placed in Ringer solution for 10 to 20 minutes. The various solutions were applied with a perfusion system with an estimated exchange time of 1.5 s. Recordings started 2-5 min before addition of the first test solution. Ionomycin (5  $\mu$ M) was added at the end of the recordings as a control stimulus. Calcium (Ca<sup>2+</sup>) signals were recorded with a Leica AF 6000LX

system with a Leica DMI8000 inverted microscope and an Andor-Zyla-VCS04494 camera. A halogen lamp was used with a 488 +/- 20 nm excitation filter and a 530 +/- 20 nm emission filter. A 40X (HC PL FluoTar L 40X/0.70 Dry) or a 20X (N-Plan L 20X/0.35 Dry) air objective were used. Leica LasX 2.0.014332 software was used to collect data and control the system. Acquisition parameters were: 120 ms exposure time, 2x2 binning, 512 x 512 pixels resolution, and a voxel size of 1.3  $\mu\text{m}$  for the 20X objective. Whole images were collected every 10 seconds. LAS X, ImageJ, Clampfit 10 (Molecular Devices), and SigmaPlot 12 were used to analyze data. Changes in intracellular  $\text{Ca}^{2+}$  concentration are presented as  $(F/F_{\text{Iono}})$  after background subtraction. All imaging experiments were done at room temperature. Cells were counted as responsive if they had changes in fluorescence of at least 5-10% of ionomycin responses.

#### Isometric Tension Recording

Human myometrial tissues (0.1-1.0  $\text{cm}^2$ ) from four non-laboring women at term were isolated and cut into strips (10 x 2 mm) and immediately placed in 4° Krebs solution containing (in mM): 133 NaCl, 4.7 KCl, 1.2  $\text{MgSO}_4$ , 1.2  $\text{KH}_2\text{PO}_4$ , 10 TES, 1.2  $\text{CaCl}_2$ , and 11.1 glucose, pH 7.4. Strips were mounted to a force transducer in organ baths filled with oxygenated (95%  $\text{O}_2$ , 5%  $\text{CO}_2$ ) Krebs solution at 35.7°C, and tension was recorded with an muscle strip myograph data acquisition system (DMT, Ann Arbor, MI). Basal tension (2 g) was applied to the tissue strips, and strips were equilibrated for 1 hr until spontaneous myometrial contractility appeared. When four stable regular contractile waveforms were observed, Krebs solution was changed to modified Krebs solution containing (in mM): 33.25 NaCl, 99.75 CholineCl, 4.7 KCl, 1.2  $\text{MgSO}_4$ , 1.2  $\text{KH}_2\text{PO}_4$ , 10 TES, 1.2  $\text{CaCl}_2$ , and 11.1 glucose, pH 7.4. Tension was recorded for 30 min. Traces obtained in the last 10 minutes before and after adding modified Krebs solution were compared by using LabChart 8 (ADInstruments, Colorado Springs, CO). Basal tension and area under the curve (AUC) of phasic contractions of the myometrial strips were calculated in both solutions.

### In Situ Proximity Ligation Assay

The hTERT-HM cells were cultured in 8-well chambered slides (LabTek/Sigma, St. Louis, MO), serum-deprived in 0.5% FBS for 24 h, washed in ice-cold 1X PBS, and then fixed in 4% (wt/vol) paraformaldehyde (PFA) in PBS for 20 min at room temperature with gentle rocking. After 4 x 5-min washes in 1X PBS, cells were permeabilized with 0.1% NP-40 for 5 min at room temperature, washed twice with PBS, and washed once in 100 mM Glycine in PBS to quench remaining PFA. The slides were rinsed in milliQ water to remove residual salts. Duolink *in situ* proximity ligation assay (Sigma, St. Louis, MO) labeling was performed with the following antibodies: NALCN (mouse monoclonal, 1:100, StressMarq) and SLO2.1 (rabbit polyclonal, 1:200, Alomone). The manufacturer's protocol was followed completely except that cells were stained with NucBlue Fixed Cell Stain ReadyProbes (Invitrogen, Carlsbad, CA) for 5 min at room temperature before the final wash in wash buffer B. The slides were dried at room temperature in the dark, mounted in Vectashield (Vector Laboratories, Burlingame, CA), and stored in the dark at -20 °C until analysis. Images were collected with a fluorescent Leica AF 6000LX system (Buffalo Grove, IL, USA) with a Leica DMI8000 inverted microscope and an Andor-Zyla-VCS04494 camera with excitation wavelengths of 488 nm for PLA signals and 340 nm for NucBlue. A 63X objective (HC PL FluoTar L 63X/0.70 Dry) was used to obtain the images. Leica LasX software was used to control the system and collect data. Acquisition parameters were: 2 and 1.5 seconds of exposure time for 488 and 340 nm, respectively, no binning, 2048 x 2048 pixels resolution, and voxel size of 0.103  $\mu$ m. Whole images were collected every 10 seconds. LAS X, ImageJ software (National Institutes of Health, Bethesda, Maryland, USA), and SigmaPlot 12 (Systat Software Inc., Chicago, IL, USA) were used to analyze images. Data are presented as number of punctae (counted after background subtraction) per cell. All imaging experiments were done at room temperature.

### Statistical Analyses

Sigmaplot, version 12.0 (Systat Software Inc.) was used for all statistical analyses. An unpaired Student's t-test was used to compare independent samples, and a paired t-test was used to compare data in case-control studies performed in the same individuals. Data are expressed as the mean  $\pm$  SD. *P-value* < 0.05 was considered statistically significant.

## **Acknowledgements**

We thank Dr. Deborah Frank for critical review of the manuscript. We also thank the Clinical Research Nurses in the Department of Obstetrics and Gynecology at Barnes Jewish Hospital for consenting patients and acquiring human myometrial biopsies. We thank the Washington University Flow Cytometry & Fluorescence Activated Cell Sorting Cores for use of their FACSCanto II TM cytometer and guidance.

## **Author Contributions**

J.J.F. and C.A. designed, performed and analyzed the experiments. L.C.P.M. assisted with the flow cytometry experiments. J.J.F., C.A., S.K.E. and C.M.S. analyzed data and interpreted the results. J.J.F. and C.A. prepared figures. J.J.F., C.A., S.K.E. and C.M.S. drafted the manuscript. J.J.F., C.A., L.C.P.M., S.K.E. and C.M.S. edited, revised and approved the final version of the manuscript.

## **Funding**

This work was supported by NIH grant 1F30HD095591 (to C.A.), an American Physiological Society William Town send Porter Pre-doctoral Fellowship Award (to C.A.), March of Dimes grant #6-FY18-664 (to S.K.E.), National Institutes of Health grant R01HD088097 (to C.M.S. and S.K.E.), and the Department of Obstetrics and Gynecology at Washington University in St. Louis.



## References.

- Amazu, C., Ma, X., Henkes, C., Ferreira, J. J., Santi, C. M., & England, S. K. (2020). Progesterone and estrogen regulate NALCN expression in human myometrial smooth muscle cells. *Am J Physiol Endocrinol Metab*. doi: 10.1152/ajpendo.00320.2019
- Amedee, T., Mironneau, C., & Mironneau, J. (1987). The calcium channel current of pregnant rat single myometrial cells in short-term primary culture. *J Physiol*, 392, 253-272. doi: 10.1113/jphysiol.1987.sp016779
- Arnaudeau, S., Lepretre, N., & Mironneau, J. (1994). Oxytocin mobilizes calcium from a unique heparin-sensitive and thapsigargin-sensitive store in single myometrial cells from pregnant rats. *Pflugers Arch*, 428(1), 51-59. doi: 10.1007/bf00374751
- Babich, L. G., Ku, C. Y., Young, H. W., Huang, H., Blackburn, M. R., & Sanborn, B. M. (2004). Expression of capacitative calcium TrpC proteins in rat myometrium during pregnancy. *Biol Reprod*, 70(4), 919-924. doi: 10.1095/biolreprod.103.023325
- Bowman, C. L., Gottlieb, P. A., Suchyna, T. M., Murphy, Y. K., & Sachs, F. (2007). Mechanosensitive ion channels and the peptide inhibitor GsMTx-4: history, properties, mechanisms and pharmacology. *Toxicon*, 49(2), 249-270. doi: 10.1016/j.toxicon.2006.09.030
- Brainard, A. M., Korovkina, V. P., & England, S. K. (2007). Potassium channels and uterine function. *Semin Cell Dev Biol*, 18(3), 332-339. doi: 10.1016/j.semcdb.2007.05.008
- Budelli, G., Hage, T. A., Wei, A., Rojas, P., Jong, Y. J., O'Malley, K., & Salkoff, L. (2009). Na<sup>+</sup>-activated K<sup>+</sup> channels express a large delayed outward current in neurons during normal physiology. *Nat Neurosci*, 12(6), 745-750. doi: 10.1038/nn.2313
- Casteels, R., & Kuriyama, H. (1965). Membrane Potential and Ionic Content in Pregnant and Non-Pregnant Rat Myometrium. *J Physiol*, 177, 263-287. doi: 10.1113/jphysiol.1965.sp007591
- Condon, J., Yin, S., Mayhew, B., Word, R. A., Wright, W. E., Shay, J. W., & Rainey, W. E. (2002). Telomerase immortalization of human myometrial cells. *Biol Reprod*, 67(2), 506-514.
- Csapo, A., Erdos, T., De Mattos, C. R., Gramss, E., & Moscovitz, C. (1965). Stretch-induced uterine growth, protein synthesis and function. *Nature*, 207(5004), 1378-1379. doi: 10.1038/2071378a0
- Dalrymple, A., Mahn, K., Poston, L., Songu-Mize, E., & Tribe, R. M. (2007). Mechanical stretch regulates TRPC expression and calcium entry in human myometrial smooth muscle cells. *Mol Hum Reprod*, 13(3), 171-179. doi: 10.1093/molehr/gal110
- Dalrymple, A., Slater, D. M., Beech, D., Poston, L., & Tribe, R. M. (2002). Molecular identification and localization of Trp homologues, putative calcium channels, in pregnant human uterus. *Mol Hum Reprod*, 8(10), 946-951. doi: 10.1093/molehr/8.10.946
- Douglas, A. J., Clarke, E. W., & Goldspink, D. F. (1988). Influence of mechanical stretch on growth and protein turnover of rat uterus. *Am J Physiol*, 254(5 Pt 1), E543-548. doi: 10.1152/ajpendo.1988.254.5.E543
- Dryer, S. E. (2003). Molecular identification of the Na<sup>+</sup>-activated K<sup>+</sup> channel. *Neuron*, 37(5), 727-728. doi: 10.1016/s0896-6273(03)00119-3
- Ferreira, J. J., Butler, A., Stewart, R., Gonzalez-Cota, A. L., Lybaert, P., Amazu, C., . . . Santi, C. M. (2019). Oxytocin can regulate myometrial smooth muscle excitability by inhibiting the Na<sup>(+)</sup>-activated K<sup>(+)</sup> channel, Slo2.1. *J Physiol*, 597(1), 137-149. doi: 10.1113/JP276806
- Hage, T. A., & Salkoff, L. (2012). Sodium-activated potassium channels are functionally coupled to persistent sodium currents. *J Neurosci*, 32(8), 2714-2721. doi: 10.1523/JNEUROSCI.5088-11.2012

- Kameyama, M., Kakei, M., Sato, R., Shibasaki, T., Matsuda, H., & Irisawa, H. (1984). Intracellular Na<sup>+</sup> activates a K<sup>+</sup> channel in mammalian cardiac cells. *Nature*, 309(5966), 354-356. doi: 10.1038/309354a0
- Khaliq, Z. M., & Bean, B. P. (2010). Pacemaking in dopaminergic ventral tegmental area neurons: depolarizing drive from background and voltage-dependent sodium conductances. *J Neurosci*, 30(21), 7401-7413. doi: 10.1523/JNEUROSCI.0143-10.2010
- Khan, R. N., Smith, S. K., Morrison, J. J., & Ashford, M. L. (1993). Properties of large-conductance K<sup>+</sup> channels in human myometrium during pregnancy and labour. *Proc Biol Sci*, 251(1330), 9-15. doi: 10.1098/rspb.1993.0002
- Kim, B. J., Chang, I. Y., Choi, S., Jun, J. Y., Jeon, J. H., Xu, W. X., . . . So, I. (2012). Involvement of Na<sup>+</sup>-leak channel in substance P-induced depolarization of pacemaking activity in interstitial cells of Cajal. *Cell Physiol Biochem*, 29(3-4), 501-510. doi: 10.1159/000338504
- Kiyonaka, S., Kato, K., Nishida, M., Mio, K., Numaga, T., Sawaguchi, Y., . . . Mori, Y. (2009). Selective and direct inhibition of TRPC3 channels underlies biological activities of a pyrazole compound. *Proc Natl Acad Sci U S A*, 106(13), 5400-5405. doi: 10.1073/pnas.0808793106
- Koh, S. D., Jun, J. Y., Kim, T. W., & Sanders, K. M. (2002). A Ca<sup>2+</sup>-inhibited non-selective cation conductance contributes to pacemaker currents in mouse interstitial cell of Cajal. *J Physiol*, 540(Pt 3), 803-814. doi: 10.1113/jphysiol.2001.014639
- Ku, C. Y., Babich, L., Word, R. A., Zhong, M., Ulloa, A., Monga, M., & Sanborn, B. M. (2006). Expression of transient receptor channel proteins in human fundal myometrium in pregnancy. *J Soc Gynecol Investig*, 13(3), 217-225. doi: 10.1016/j.jsig.2005.12.007
- Kuriyama, H., & Suzuki, H. (1976). Changes in electrical properties of rat myometrium during gestation and following hormonal treatments. *J Physiol*, 260(2), 315-333.
- Lacampagne, A., Gannier, F., Argibay, J., Garnier, D., & Le Guennec, J. Y. (1994). The stretch-activated ion channel blocker gadolinium also blocks L-type calcium channels in isolated ventricular myocytes of the guinea-pig. *Biochim Biophys Acta*, 1191(1), 205-208.
- Lammers, W. J. (2013). The electrical activities of the uterus during pregnancy. *Reprod Sci*, 20(2), 182-189. doi: 10.1177/1933719112446082
- Li, P., Halabi, C. M., Stewart, R., Butler, A., Brown, B., Xia, X., . . . Salkoff, L. (2019). Sodium-activated potassium channels moderate excitability in vascular smooth muscle. *J Physiol*, 597(20), 5093-5108. doi: 10.1113/JP278279
- Li, Y., Lorca, R. A., Ma, X., Rhodes, A., & England, S. K. (2014). BK channels regulate myometrial contraction by modulating nuclear translocation of NF-kappaB. *Endocrinology*, 155(8), 3112-3122. doi: 10.1210/en.2014-1152
- Lu, B., Su, Y., Das, S., Liu, J., Xia, J., & Ren, D. (2007). The neuronal channel NALCN contributes resting sodium permeability and is required for normal respiratory rhythm. *Cell*, 129(2), 371-383. doi: 10.1016/j.cell.2007.02.041
- McCloskey, C., Rada, C., Bailey, E., McCavera, S., van den Berg, H. A., Atia, J., . . . Blanks, A. M. (2014). The inwardly rectifying K<sup>+</sup> channel KIR7.1 controls uterine excitability throughout pregnancy. *EMBO Mol Med*, 6(9), 1161-1174. doi: 10.15252/emmm.201403944
- Molina, L. C. P., Gunderson, S., Riley, J., Lybaert, P., Borrego-Alvarez, A., Jungheim, E. S., & Santi, C. M. (2019). Membrane Potential Determined by Flow Cytometry Predicts Fertilizing Ability of Human Sperm. *Front Cell Dev Biol*, 7, 387. doi: 10.3389/fcell.2019.00387
- Parkington, H. C., Tonta, M. A., Brennecke, S. P., & Coleman, H. A. (1999). Contractile activity, membrane potential, and cytoplasmic calcium in human uterine smooth muscle in the third trimester of pregnancy and during labor. *Am J Obstet Gynecol*, 181(6), 1445-1451. doi: 10.1016/s0002-9378(99)70390-x

- Plasek, J., & Hroudá, V. (1991). Assessment of membrane potential changes using the carbocyanine dye, diS-C3-(5): synchronous excitation spectroscopy studies. *Eur Biophys J*, 19(4), 183-188. doi: 10.1007/BF00196344
- Reinl, E. L., Cabeza, R., Gregory, I. A., Cahill, A. G., & England, S. K. (2015). Sodium leak channel, non-selective contributes to the leak current in human myometrial smooth muscle cells from pregnant women. *Mol Hum Reprod*, 21(10), 816-824. doi: 10.1093/molehr/gav038
- Reinl, E. L., Zhao, P., Wu, W., Ma, X., Amazu, C., Bok, R., . . . England, S. K. (2018). Na<sup>+</sup>-Leak Channel, Non-Selective (NALCN) Regulates Myometrial Excitability and Facilitates Successful Parturition. *Cell Physiol Biochem*, 48(2), 503-515. doi: 10.1159/000491805
- Santi, C. M., Martinez-Lopez, P., de la Vega-Beltran, J. L., Butler, A., Alisio, A., Darszon, A., & Salkoff, L. (2010). The SLO3 sperm-specific potassium channel plays a vital role in male fertility. *FEBS Lett*, 584(5), 1041-1046. doi: 10.1016/j.febslet.2010.02.005
- Smith, C. O., Wang, Y. T., Nadtochiy, S. M., Miller, J. H., Jonas, E. A., Dirksen, R. T., . . . Brookes, P. S. (2018). Cardiac metabolic effects of KNa1.2 channel deletion and evidence for its mitochondrial localization. *FASEB J*, fj201800139R. doi: 10.1096/fj.201800139R
- Takahashi, I., & Yoshino, M. (2015). Functional coupling between sodium-activated potassium channels and voltage-dependent persistent sodium currents in cricket Kenyon cells. *J Neurophysiol*, 114(4), 2450-2459. doi: 10.1152/jn.00087.2015
- Wang, H., Cheng, X., Tian, J., Xiao, Y., Tian, T., Xu, F., . . . Zhu, M. X. (2020). TRPC channels: Structure, function, regulation and recent advances in small molecular probes. *Pharmacol Ther*, 209, 107497. doi: 10.1016/j.pharmthera.2020.107497
- Wray, S., Jones, K., Kupittayanant, S., Li, Y., Matthew, A., Monir-Bishty, E., . . . Shmygol, A. V. (2003). Calcium signaling and uterine contractility. *J Soc Gynecol Investig*, 10(5), 252-264.
- Yang, X. C., & Sachs, F. (1989). Block of stretch-activated ion channels in *Xenopus* oocytes by gadolinium and calcium ions. *Science*, 243(4894 Pt 1), 1068-1071.
- Yuan, A., Santi, C. M., Wei, A., Wang, Z. W., Pollak, K., Nonet, M., . . . Salkoff, L. (2003). The sodium-activated potassium channel is encoded by a member of the Slo gene family. *Neuron*, 37(5), 765-773. doi: 10.1016/s0896-6273(03)00096-5

## Figures legends:

**Figure 1. SLO2.1 channels are activated by a NALCN-Dependent Gd<sup>3+</sup> sensitive Na<sup>+</sup> leak current in human MSMCs. (A)** Schematic of whole-cell recording set-up. TEA, tetraethylammonium. **(B)** Representative whole-cell currents ( $V_h = -70$  mV, with step pulses from  $-80$  to  $+150$  mV) from human MSMC recorded in 0 mM Na<sup>+</sup> or 80 mM Na<sup>+</sup>. The Na<sup>+</sup>-dependent currents were calculated by subtracting traces (80 mM  $-$  0 mM Na<sup>+</sup>). **(C)** Same as **(B)**, in the presence of 10  $\mu$ M Gd<sup>3+</sup>. **(D and E)** Graphs depicting the percentage of Na<sup>+</sup>-dependent currents at  $+80$  mV and  $-60$  mV, respectively, in 0  $\mu$ M Gd<sup>3+</sup> or 10  $\mu$ M Gd<sup>3+</sup> ( $n = 5$  cells, data plotted as the mean and standard deviation). In **(D)**, values are  $94.75 \pm 77.14$  for 0

$\mu\text{M Gd}^{3+}$  and  $11.20 \pm 16.36$  for  $10 \mu\text{M Gd}^{3+}$ . In **(E)**, values are  $89.24 \pm 63.56$  for  $0 \mu\text{M Gd}^{3+}$  and  $3.51 \pm 23.50$  for  $10 \mu\text{M Gd}^{3+}$ . \*  $P < 0.05$  by unpaired t-test.

**Figure 2. Activation of SLO2.1 by the NALCN-dependent  $\text{Na}^+$  leak hyperpolarizes the membrane potential.** **(A)** Experimental schemes and representative images of relative shifts of DiSC3(5) fluorescence induced by sodium, choline, lithium, GsMTx-4 and Pyr3, and  $\text{Gd}^{3+}$  in hTERT-HM cells. **(B)** Quantification of shifts in cells by sodium ( $n = 18$ ), choline ( $n = 15$ ), lithium ( $n = 6$ ), and sodium in the presence of GsMTx-4 and Pyr3 ( $n = 9$ ) or  $\text{Gd}^{3+}$  ( $n = 5$ ) normalized to changes in fluorescence in the presence of valinomycin. Data are presented as mean and standard deviation. \*  $P < 0.05$ , \*\*  $P < 0.01$ , \*\*\*  $P < 0.001$  by unpaired t-test with Mann-Whitney corrections.

**Figure 3:  $\text{Na}^+$  leak regulates intracellular calcium homeostasis and basal tension in human MSMCs and myometrial tissue.** **(A, B, C)** Representative fluorescence traces from human MSMCs loaded with  $10 \mu\text{M Fluo-4 AM}$  in the presence of **(A)** 5, 10, 20, and 50 mM external KCl; **(B)** 80 mM  $\text{Na}^+$  or Choline, and **(C)** 135 mM  $\text{Na}^+$  or  $\text{Li}^+$ . **(D)** Graphs of the areas under the curve of the first 5 min after changing the solutions in **B, C**, and **Supp. 4C**. In **D**, values are  $8.19 \pm 8.9$  ( $n = 21$ ) for  $\text{Na}^+$ ,  $61.5 \pm 43.6$  ( $n = 10$ ) for Choline,  $80.3 \pm 55.8$  ( $n = 9$ ) for  $\text{Li}^+$  and  $3.3 \pm 2.8$  ( $n = 3$ ) for  $\text{Li}^+$  + Verapamil (**Supp. 4C**). **(E)** Graphs of the area under the curve (AUC) after 20 min in the indicated solutions. In **E**, values are  $7.0 \pm 7.7$  ( $n = 21$ ) for  $\text{Na}^+$ ,  $34.2 \pm 22.9$  ( $n = 10$ ) for  $\text{Li}^+$ , and  $6.94 \pm 6.7$  ( $n = 4$ ) for  $\text{Li}^+$  + EGTA (**Supp. 4B**). All data were normalized to the fluorescence in  $5 \mu\text{M}$  ionomycin and  $2 \text{ mM}$  extracellular  $\text{Ca}^{2+}$  (Iono), and all data are presented as mean and standard deviation. **(F)** Representative tension-recording trace of myometrial tissue obtained from a woman undergoing elective Cesarean delivery in normal and low extracellular  $\text{Na}^+$ . **(G, H)** Quantification of **(G)** basal tension and **(H)** AUC when tissue was bathed with control or low  $\text{Na}^+$  solutions. Data are presented as mean and standard deviation;  $n = 4$  for each. \*  $P < 0.05$ , \*\*  $P < 0.01$ , and \*\*\*  $P < 0.001$  by **(D, E)** unpaired t-test or **(G, H)** paired t-test.

**Figure 4: NALCN and SLO2.1 are in proximity in human MSMCs cells.** **(A)** Representative proximity ligation assay (PLA) labeling of hTERT-HM and human MSMCs with the indicated single antibodies and antibody combinations. (Scale bar,  $10 \mu\text{m}$ .) **(B, C)** Average number of PLA punctae in **(B)** hTERT-HM cells ( $n = 4$ ) and **(C)** human primary MSMCs (from  $n = 4$  patients).

Over 300 cells per condition were processed. Data are presented as mean and standard deviation. \* $P < 0.05$  and \*\*\* $P < 0.001$  by unpaired t-test.

**Figure 5. Proposed model by which the NALCN/SLO2.1 complex regulates myometrial excitability.** During the quiescent state, progesterone binding to progesterone receptor (PR<sub>A/B</sub>) increases NALCN expression and activity (Amazu et al., 2020). Sodium current through NALCN activates SLO2.1 channels, increasing K<sup>+</sup> efflux to maintain the cell in a hyperpolarized state. As a result, voltage-dependent Ca<sup>2+</sup> channels (VDCCs) are closed, and uterine contractions do not occur. In the contractile state, estrogen acting on ER $\alpha$  inhibits NALCN expression (Amazu et al., 2020), leading to decreased SLO2.1 activity. The reduced K<sup>+</sup> efflux depolarizes the membrane, leading to VDCC activation, increase in intracellular Ca<sup>2+</sup>, and uterine contractility. At labor, Oxytocin (OXT) binds to the oxytocin receptor (OTR), leading to activation of phospholipase C (PLC), production of phosphatidylinositol 4,5-bisphosphate (PIP<sub>2</sub>) and production of inositol triphosphate (IP<sub>3</sub>). IP<sub>3</sub> activates release of Ca<sup>2+</sup> from intracellular stores, and PIP<sub>2</sub> activates protein kinase C (PKC), which inhibits SLO2.1 (Ferreira et al., 2019). This SLO2.1 inhibition further depolarizes the membrane, thus opening more VDCCs, increasing intracellular Ca<sup>2+</sup>, and further activating myosin to cause muscle contraction.

**A.**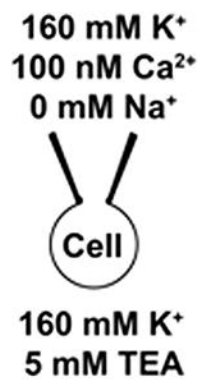**B. Control**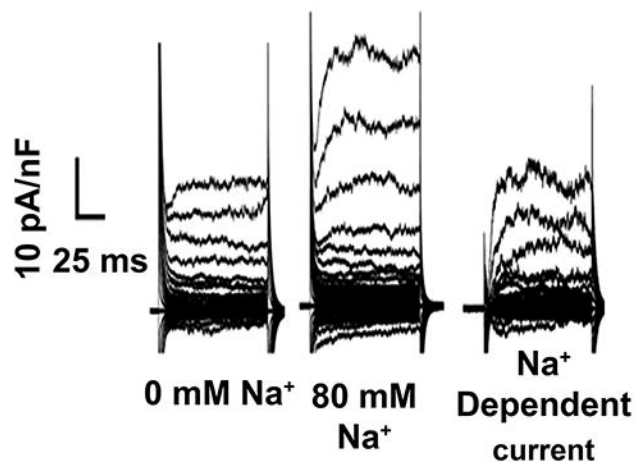**C. 10  $\mu$ M Gd<sup>3+</sup> + 80 mM Na<sup>+</sup>**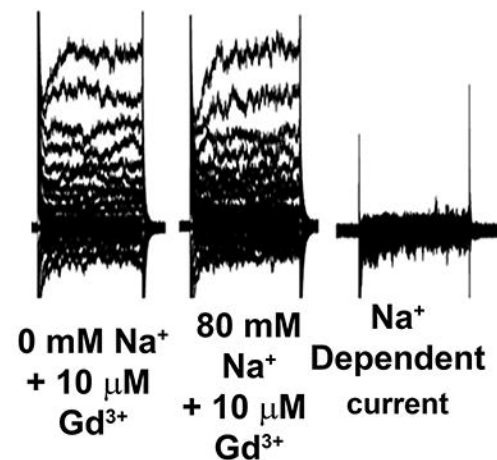**D**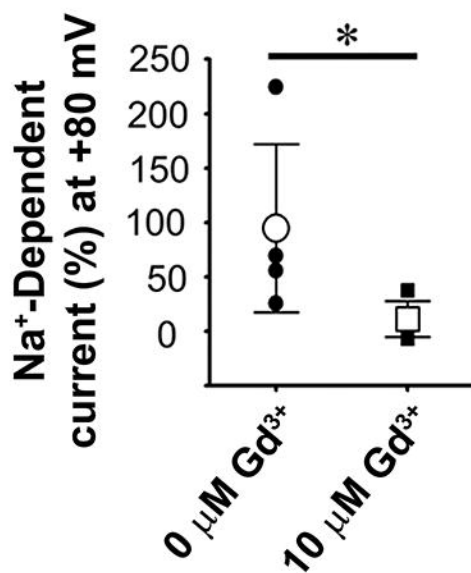**E**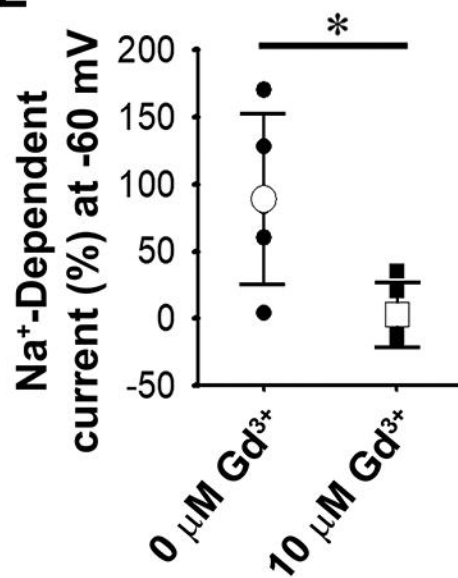



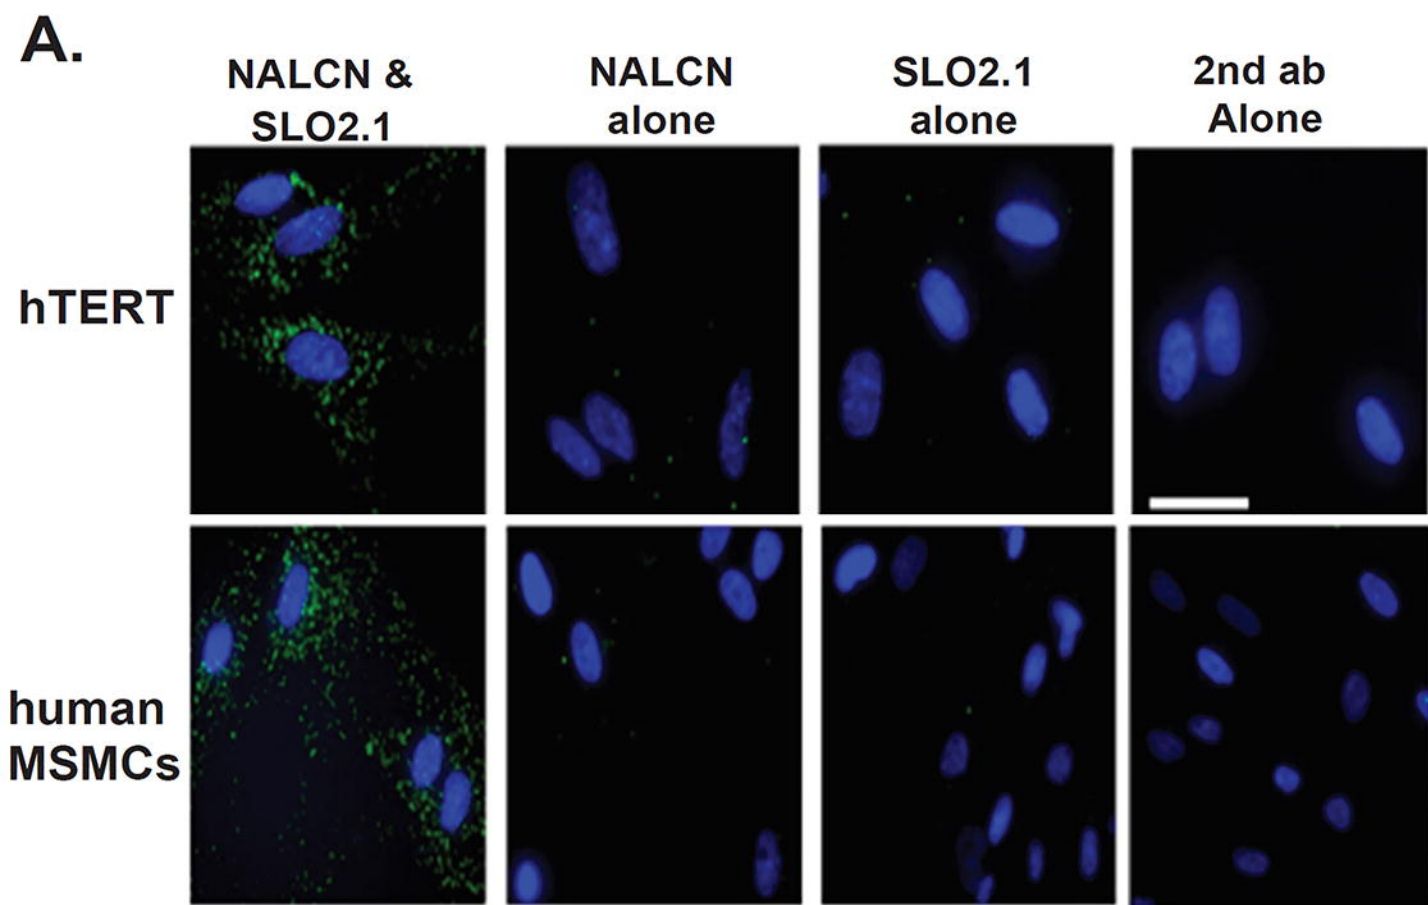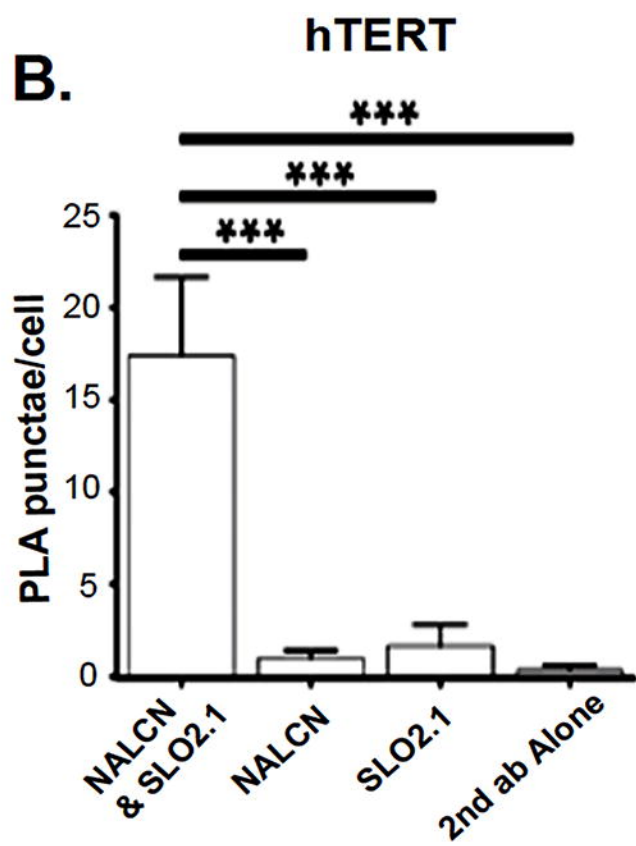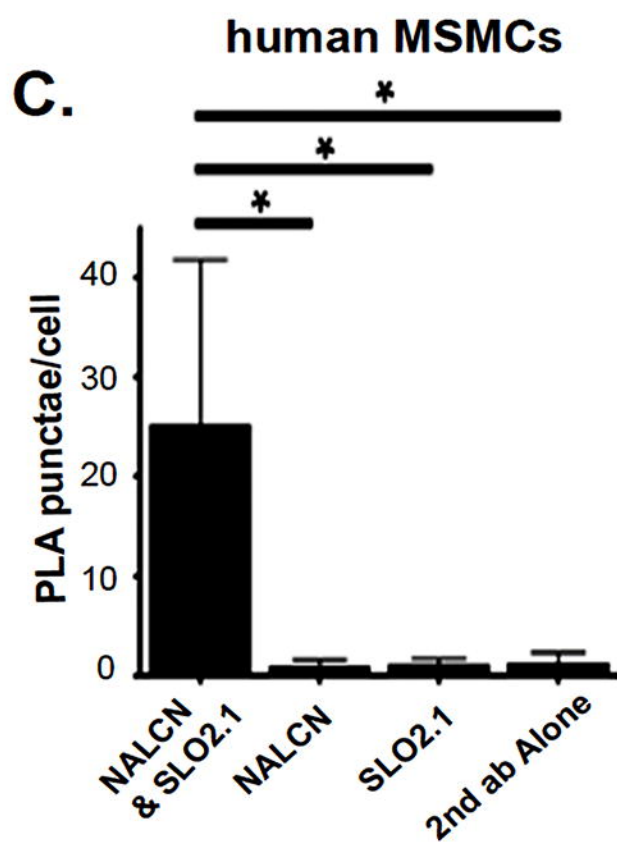

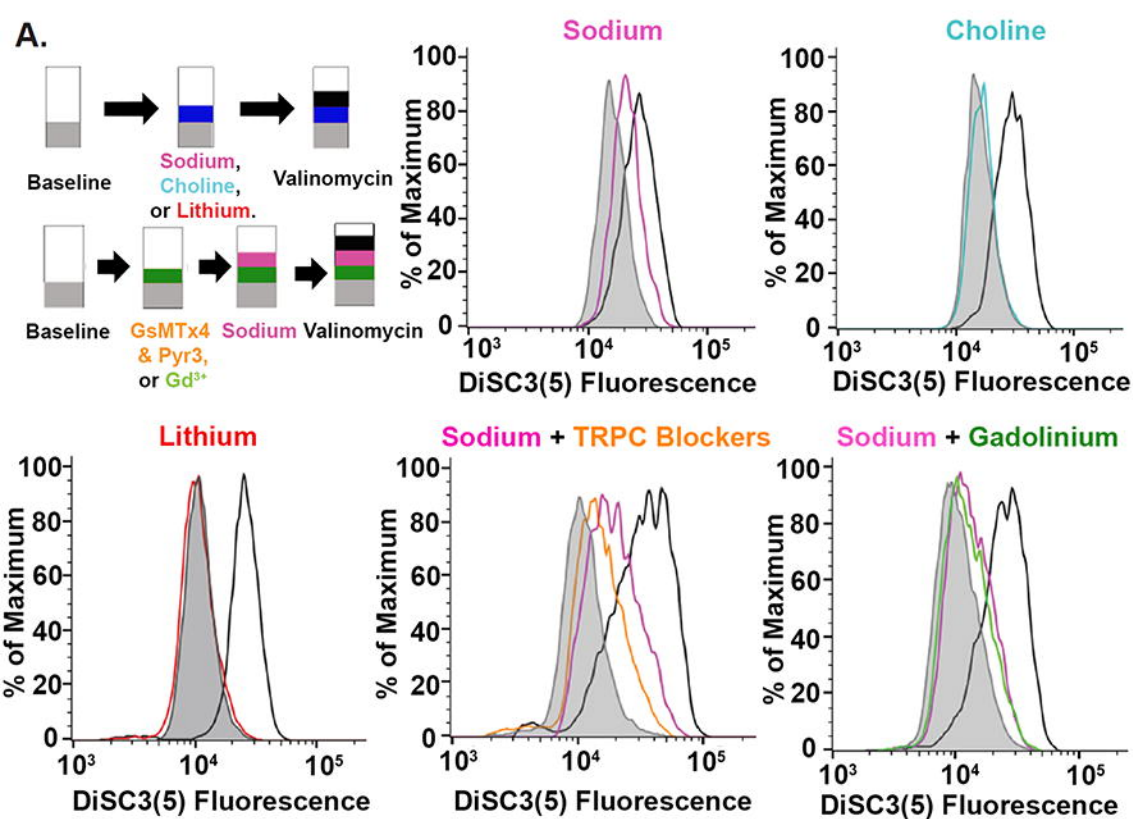

**B.**

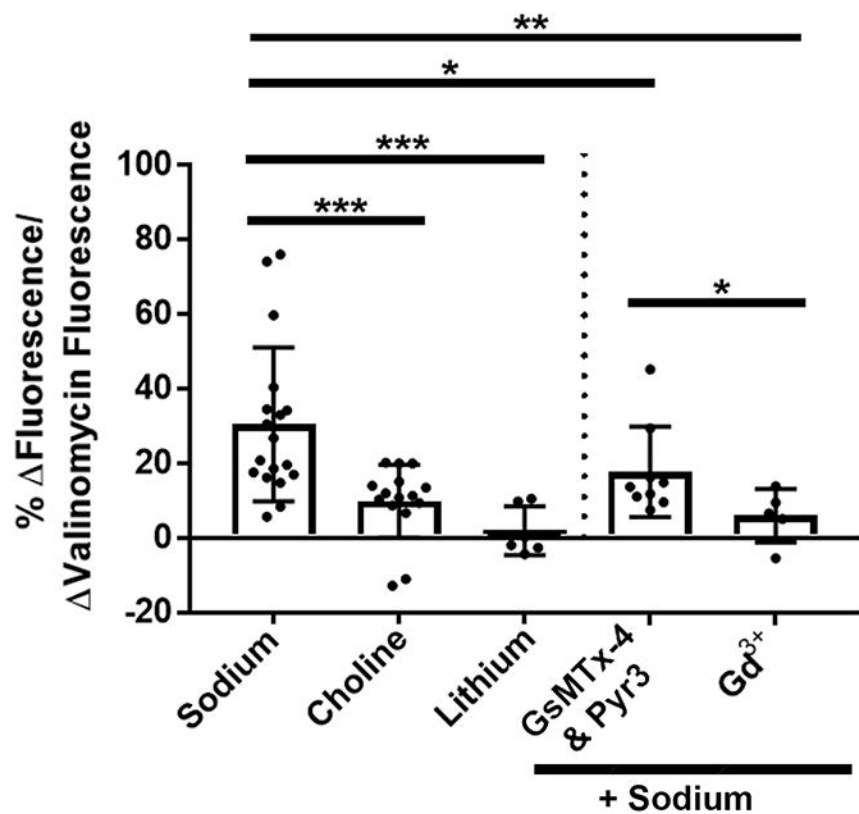



### A. Membrane depolarization

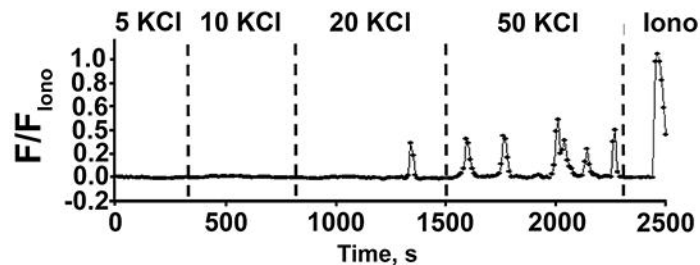

### B. Extracellular Choline as substitute for Na<sup>+</sup>

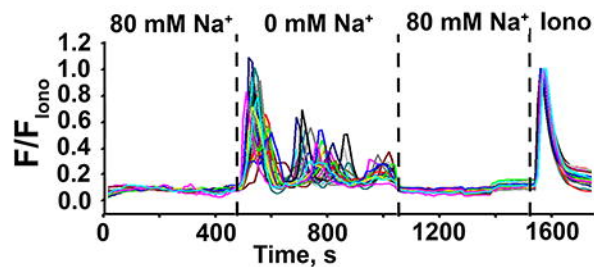

### C. Extracellular Li<sup>+</sup> as substitute for Na<sup>+</sup>

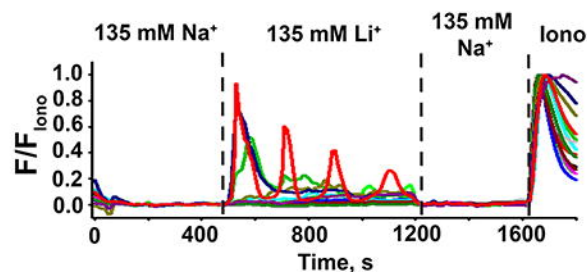

### D. Active Response Graph

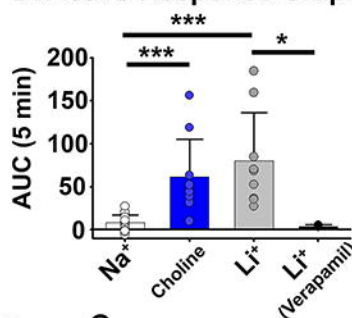

### E. Basal level after 20 min

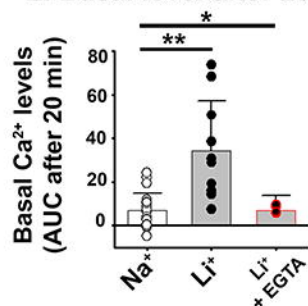

### F. Tension in Term-Non Labor human myometrium tissue.

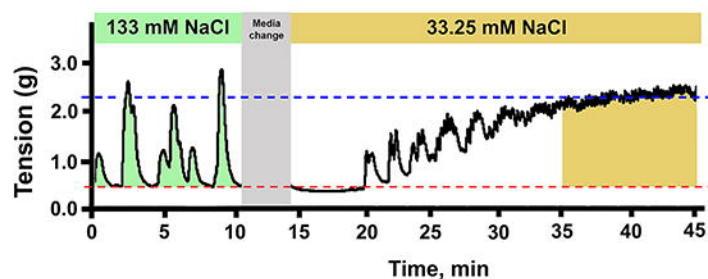

■ ■ ■ Basal Tension 33.25 mM Na<sup>+</sup>  
 ■ ■ ■ Basal Tension 133 mM Na<sup>+</sup>

### G.

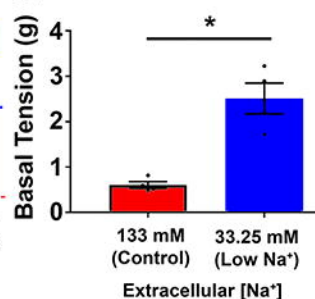

### H.

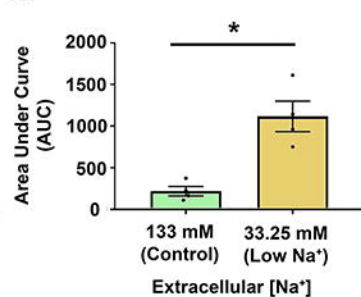

■ AUC in 133 mM Na<sup>+</sup>  
 ■ AUC in 33.25 mM Na<sup>+</sup>

## Quiescent State

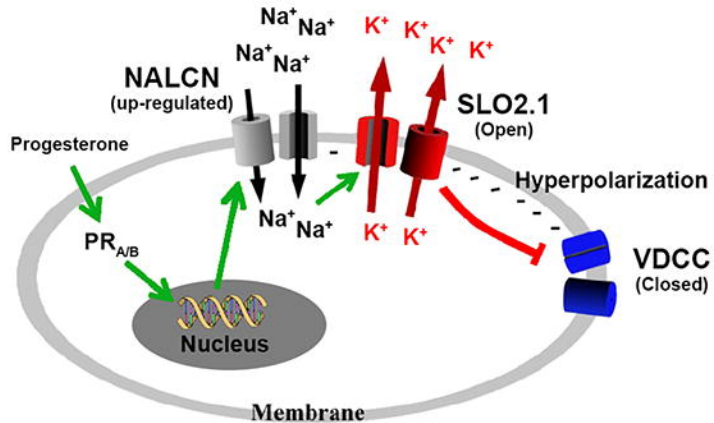

## Contractile State

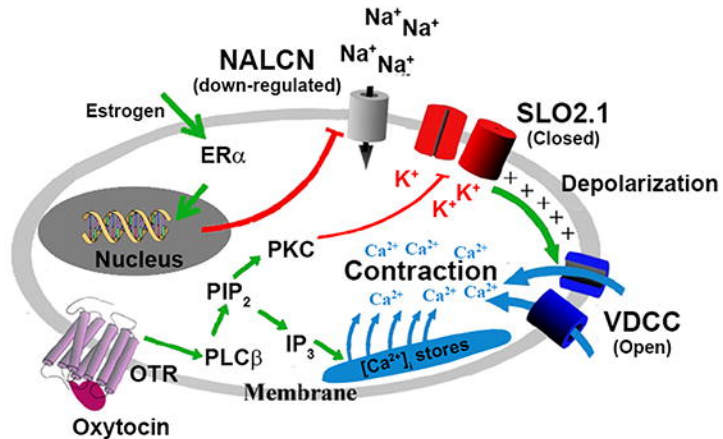

Source: https://www.biorxiv.org/content/biorxiv/early/2020/08/03/2020.07.31.229138.full.pdf
